# Supplementary material for: Lactobacillus plantarum HNU082-derived improvements in the intestinal microbiome prevent the development of hyperlipidaemia
Source: Royal Society of Chemistry journal article supplement (doi:10.1039/c7fo00902j), 2017-01-01
Supplement: c7fo00902j1.pdf [file c7fo00902j1.pdf]

1 **Supplement Table**

2

3 **Table S1** The composition of the normal diet.

| <b>Ingredient</b>   | <b>Content (g)</b> | <b>Ingredient</b>          | <b>Content (g)</b> |
|---------------------|--------------------|----------------------------|--------------------|
| <b>Casein</b>       | 140                | <b>Soybean Oil</b>         | 40                 |
| <b>L-Cystine</b>    | 1.8                | <b>t-Butylhydroquinone</b> | 0.008              |
| <b>Corn Starch</b>  | 495.692            | <b>Mineral Mix</b>         | 35                 |
| <b>Maltodextrin</b> | 125                | <b>Vitamin Mix</b>         | 10                 |
| <b>Sucrose</b>      | 100                | <b>Choline Bitartrate</b>  | 2.5                |
| <b>Cellulose</b>    | 50                 | <b>Total</b>               | 1000               |

4

5
